# Supplementary material for: Consideration of Cybersecurity Risks in the Benefit-Risk Analysis of Medical Devices: Scoping Review
Source: PubMed Central journal article supplement (PMC11707448; doi:10.2196/65528), 2024-12-24
Supplement: jmir_v26i1e65528_app1.pdf [file jmir_v26i1e65528_app1.pdf]

# Consideration of Cybersecurity in the Benefit-Risk Analysis of Medical Devices: A Scoping Review - Multimedia Appendix 1

Authors: Oscar Freyer<sup>¶</sup>, Fatemeh Jahed<sup>1</sup>, Max Ostermann<sup>1</sup>, Christian Rosenzweig<sup>2</sup>, Pascal Werner<sup>3</sup>, Stephen Gilbert<sup>1</sup>

<sup>1</sup>- Else Kröner Fresenius Center for Digital Health, TUD Dresden University of Technology, Dresden, Germany

<sup>2</sup>- Johner Institute, Konstanz, Germany

<sup>3</sup>- Regulatory.me, Mebane, North Carolina, USA

<sup>¶</sup>- corresponding author: Oscar Freyer, [oscar.freyer@tu-dresden.de](mailto:oscar.freyer@tu-dresden.de), TUD Dresden University of Technology, Else Kröner Fresenius Center for Digital Health, Fetscherstr. 74, 01307 Dresden

## Content

Table S1. PRISMA-ScR Checklist pp. 2 - 3

Table S2. Search Results with Links pp. 4 - 6

**Table S1. PRISMA-ScR Checklist**

**Preferred Reporting Items for Systematic reviews and Meta-Analyses extension for Scoping Reviews (PRISMA-ScR) Checklist**

| SECTION                                               | ITEM | PRISMA-ScR CHECKLIST ITEM                                                                                                                                                                                                                                                                                  | REPORTED ON PAGE # |
|-------------------------------------------------------|------|------------------------------------------------------------------------------------------------------------------------------------------------------------------------------------------------------------------------------------------------------------------------------------------------------------|--------------------|
| <b>TITLE</b>                                          |      |                                                                                                                                                                                                                                                                                                            |                    |
| Title                                                 | 1    | Identify the report as a scoping review.                                                                                                                                                                                                                                                                   | 1                  |
| <b>ABSTRACT</b>                                       |      |                                                                                                                                                                                                                                                                                                            |                    |
| Structured summary                                    | 2    | Provide a structured summary that includes (as applicable): background, objectives, eligibility criteria, sources of evidence, charting methods, results, and conclusions that relate to the review questions and objectives.                                                                              | 1                  |
| <b>INTRODUCTION</b>                                   |      |                                                                                                                                                                                                                                                                                                            |                    |
| Rationale                                             | 3    | Describe the rationale for the review in the context of what is already known. Explain why the review questions/objectives lend themselves to a scoping review approach.                                                                                                                                   | 3                  |
| Objectives                                            | 4    | Provide an explicit statement of the questions and objectives being addressed with reference to their key elements (e.g., population or participants, concepts, and context) or other relevant key elements used to conceptualize the review questions and/or objectives.                                  | 3                  |
| <b>METHODS</b>                                        |      |                                                                                                                                                                                                                                                                                                            |                    |
| Protocol and registration                             | 5    | Indicate whether a review protocol exists; state if and where it can be accessed (e.g., a Web address); and if available, provide registration information, including the registration number.                                                                                                             | n.a.               |
| Eligibility criteria                                  | 6    | Specify characteristics of the sources of evidence used as eligibility criteria (e.g., years considered, language, and publication status), and provide a rationale.                                                                                                                                       | 4                  |
| Information sources*                                  | 7    | Describe all information sources in the search (e.g., databases with dates of coverage and contact with authors to identify additional sources), as well as the date the most recent search was executed.                                                                                                  | 3                  |
| Search                                                | 8    | Present the full electronic search strategy for at least 1 database, including any limits used, such that it could be repeated.                                                                                                                                                                            | 3                  |
| Selection of sources of evidence†                     | 9    | State the process for selecting sources of evidence (i.e., screening and eligibility) included in the scoping review.                                                                                                                                                                                      | 4                  |
| Data charting process‡                                | 10   | Describe the methods of charting data from the included sources of evidence (e.g., calibrated forms or forms that have been tested by the team before their use, and whether data charting was done independently or in duplicate) and any processes for obtaining and confirming data from investigators. | n.a.               |
| Data items                                            | 11   | List and define all variables for which data were sought and any assumptions and simplifications made.                                                                                                                                                                                                     | 4                  |
| Critical appraisal of individual sources of evidence§ | 12   | If done, provide a rationale for conducting a critical appraisal of included sources of evidence; describe the methods used and how this information was used in any data synthesis (if appropriate).                                                                                                      | n.a.               |
| Synthesis of results                                  | 13   | Describe the methods of handling and summarizing the data that were charted.                                                                                                                                                                                                                               | 4                  |

| SECTION                                       | ITEM | PRISMA-ScR CHECKLIST ITEM                                                                                                                                                                       | REPORTED ON PAGE # |
|-----------------------------------------------|------|-------------------------------------------------------------------------------------------------------------------------------------------------------------------------------------------------|--------------------|
| <b>RESULTS</b>                                |      |                                                                                                                                                                                                 |                    |
| Selection of sources of evidence              | 14   | Give numbers of sources of evidence screened, assessed for eligibility, and included in the review, with reasons for exclusions at each stage, ideally using a flow diagram.                    | 4-5                |
| Characteristics of sources of evidence        | 15   | For each source of evidence, present characteristics for which data were charted and provide the citations.                                                                                     | 5-9                |
| Critical appraisal within sources of evidence | 16   | If done, present data on critical appraisal of included sources of evidence (see item 12).                                                                                                      | n.a.               |
| Results of individual sources of evidence     | 17   | For each included source of evidence, present the relevant data that were charted that relate to the review questions and objectives.                                                           | 5-9                |
| Synthesis of results                          | 18   | Summarize and/or present the charting results as they relate to the review questions and objectives.                                                                                            | 9-17               |
| <b>DISCUSSION</b>                             |      |                                                                                                                                                                                                 |                    |
| Summary of evidence                           | 19   | Summarize the main results (including an overview of concepts, themes, and types of evidence available), link to the review questions and objectives, and consider the relevance to key groups. | 17, 18             |
| Limitations                                   | 20   | Discuss the limitations of the scoping review process.                                                                                                                                          | 21                 |
| Conclusions                                   | 21   | Provide a general interpretation of the results with respect to the review questions and objectives, as well as potential implications and/or next steps.                                       | 18-21              |
| <b>FUNDING</b>                                |      |                                                                                                                                                                                                 |                    |
| Funding                                       | 22   | Describe sources of funding for the included sources of evidence, as well as sources of funding for the scoping review. Describe the role of the funders of the scoping review.                 | 21-22              |

JB1 = Joanna Briggs Institute; PRISMA-ScR = Preferred Reporting Items for Systematic reviews and Meta-Analyses extension for Scoping Reviews.

\* Where *sources of evidence* (see second footnote) are compiled from, such as bibliographic databases, social media platforms, and Web sites.

† A more inclusive/heterogeneous term used to account for the different types of evidence or data sources (e.g., quantitative and/or qualitative research, expert opinion, and policy documents) that may be eligible in a scoping review as opposed to only studies. This is not to be confused with *information sources* (see first footnote).

‡ The frameworks by Arksey and O'Malley (6) and Levac and colleagues (7) and the JBI guidance (4, 5) refer to the process of data extraction in a scoping review as data charting.

§ The process of systematically examining research evidence to assess its validity, results, and relevance before using it to inform a decision. This term is used for items 12 and 19 instead of "risk of bias" (which is more applicable to systematic reviews of interventions) to include and acknowledge the various sources of evidence that may be used in a scoping review (e.g., quantitative and/or qualitative research, expert opinion, and policy document).

From: Tricco AC, Lillie E, Zarin W, O'Brien KK, Colquhoun H, Levac D, et al. PRISMA Extension for Scoping Reviews (PRISMA-ScR): Checklist and Explanation. *Ann Intern Med.* 2018;169:467–473. doi: [10.7326/M18-0850](https://doi.org/10.7326/M18-0850).

**Table S2. Search Results with Links**

| <b>Name</b>                                                                                                                                                                                                                                                                                  | <b>Abbreviation used in article</b> | <b>Type</b>  | <b>URL</b>                                                                                                                                                                                                                                                                                                                                            |
|----------------------------------------------------------------------------------------------------------------------------------------------------------------------------------------------------------------------------------------------------------------------------------------------|-------------------------------------|--------------|-------------------------------------------------------------------------------------------------------------------------------------------------------------------------------------------------------------------------------------------------------------------------------------------------------------------------------------------------------|
| U.S. Food and Drug Administration                                                                                                                                                                                                                                                            | FDA                                 | Organisation | <a href="https://www.fda.gov">https://www.fda.gov</a>                                                                                                                                                                                                                                                                                                 |
| National Institute of Standards and Technology (US)                                                                                                                                                                                                                                          | NIST                                | Organisation | <a href="https://www.nist.gov">https://www.nist.gov</a>                                                                                                                                                                                                                                                                                               |
| Health Sciences Authority (Singapore)                                                                                                                                                                                                                                                        | HSA                                 | Organisation | <a href="https://www.hsa.gov.sg">https://www.hsa.gov.sg</a>                                                                                                                                                                                                                                                                                           |
| Medical Device Coordination Group (EU)                                                                                                                                                                                                                                                       | MDCG                                | Organisation | <a href="https://health.ec.europa.eu/medical-devices-sector/new-regulations/guidance-mdcg-endorsed-documents-and-other-guidance_en">https://health.ec.europa.eu/medical-devices-sector/new-regulations/guidance-mdcg-endorsed-documents-and-other-guidance_en</a>                                                                                     |
| Health Canada                                                                                                                                                                                                                                                                                | Health Canada                       | Organisation | <a href="https://www.canada.ca/en/health-canada.html">https://www.canada.ca/en/health-canada.html</a>                                                                                                                                                                                                                                                 |
| Therapeutic Goods Administration (Australia)                                                                                                                                                                                                                                                 | TGA                                 | Organisation | <a href="https://www.tga.gov.au">https://www.tga.gov.au</a>                                                                                                                                                                                                                                                                                           |
| International Medical Device Regulators Forum                                                                                                                                                                                                                                                | IMDRF                               | Organisation | <a href="https://www.imdrf.org">https://www.imdrf.org</a>                                                                                                                                                                                                                                                                                             |
| Medicines & Healthcare products Regulatory Agency (UK)                                                                                                                                                                                                                                       | MHRA                                | Organisation | <a href="https://www.gov.uk/government/organisations/medicines-and-healthcare-products-regulatory-agency">https://www.gov.uk/government/organisations/medicines-and-healthcare-products-regulatory-agency</a>                                                                                                                                         |
| Ministry of Food and Drug Safety (Republic of Korea)                                                                                                                                                                                                                                         | MFDS                                | Organisation | <a href="https://www.mfds.go.kr/eng/index.do">https://www.mfds.go.kr/eng/index.do</a>                                                                                                                                                                                                                                                                 |
| International Electrotechnical Commission                                                                                                                                                                                                                                                    | IEC                                 | Organisation | <a href="https://iec.ch/homepage">https://iec.ch/homepage</a>                                                                                                                                                                                                                                                                                         |
| International Organization for Standardization                                                                                                                                                                                                                                               | ISO                                 | Organisation | <a href="https://www.iso.org/home.html">https://www.iso.org/home.html</a>                                                                                                                                                                                                                                                                             |
| Association for the Advancement of Medical Instrumentation                                                                                                                                                                                                                                   | AAMI                                | Organisation | <a href="https://www.aami.org">https://www.aami.org</a>                                                                                                                                                                                                                                                                                               |
| Federal Food, Drug, and Cosmetic Act                                                                                                                                                                                                                                                         | US_FD&C                             | Regulation   | <a href="https://www.law.cornell.edu/uscode/text/21">https://www.law.cornell.edu/uscode/text/21</a>                                                                                                                                                                                                                                                   |
| Medical Devices Regulations (SOR/98-282)                                                                                                                                                                                                                                                     | CA_MDR                              | Regulation   | <a href="https://laws-lois.justice.gc.ca/eng/regulations/sor-98-282/">https://laws-lois.justice.gc.ca/eng/regulations/sor-98-282/</a>                                                                                                                                                                                                                 |
| Therapeutic Goods (Medical Devices) Regulations 2002                                                                                                                                                                                                                                         | AU_MDR                              | Regulation   | <a href="https://www.legislation.gov.au/F2002B00237/latest">https://www.legislation.gov.au/F2002B00237/latest</a>                                                                                                                                                                                                                                     |
| Regulation (EU) 2017/745 of the European Parliament and of the Council of 5 April 2017 on medical devices, amending Directive 2001/83/EC, Regulation (EC) No 178/2002 and Regulation (EC) No 1223/2009 and repealing Council Directives 90/385/EEC and 93/42/EEC (Text with EEA relevance. ) | EU_MDR                              | Regulation   | <a href="https://eur-lex.europa.eu/legal-content/EN/TXT/?uri=celex%3A32017R0745">https://eur-lex.europa.eu/legal-content/EN/TXT/?uri=celex%3A32017R0745</a>                                                                                                                                                                                           |
| NIST SP 800 - 30                                                                                                                                                                                                                                                                             | NIST_800-30                         | Guidance     | <a href="https://www.nist.gov/privacy-framework/nist-sp-800-30">https://www.nist.gov/privacy-framework/nist-sp-800-30</a>                                                                                                                                                                                                                             |
| NIST Cyber security framework                                                                                                                                                                                                                                                                | NIST_CSF2.0                         | Guidance     | <a href="https://www.nist.gov/cyberframework">https://www.nist.gov/cyberframework</a>                                                                                                                                                                                                                                                                 |
| Factors to Consider Regarding Benefit/Risk in Medical Device Product Availability, Compliance, and Enforcement Decisions                                                                                                                                                                     | FDA_BRA_AC&ED                       | Guidance     | <a href="https://www.fda.gov/regulatory-information/search-fda-guidance-documents/factors-consider-regarding-benefit-risk-medical-device-product-availability-compliance-and">https://www.fda.gov/regulatory-information/search-fda-guidance-documents/factors-consider-regarding-benefit-risk-medical-device-product-availability-compliance-and</a> |

|                                                                                                                                                                       |                     |          |                                                                                                                                                                                                                                                                                                                                                                                                 |
|-----------------------------------------------------------------------------------------------------------------------------------------------------------------------|---------------------|----------|-------------------------------------------------------------------------------------------------------------------------------------------------------------------------------------------------------------------------------------------------------------------------------------------------------------------------------------------------------------------------------------------------|
| Postmarket Management of Cybersecurity in Medical Devices                                                                                                             | FDA_Cyber_Post      | Guidance | <a href="https://www.fda.gov/regulatory-information/search-fda-guidance-documents/postmarket-management-cybersecurity-medical-devices">https://www.fda.gov/regulatory-information/search-fda-guidance-documents/postmarket-management-cybersecurity-medical-devices</a>                                                                                                                         |
| GN-20: Guidance on Clinical Evaluation                                                                                                                                | HSA_GN-20           | Guidance | <a href="https://www.hsa.gov.sg/medical-devices/guidance-documents">https://www.hsa.gov.sg/medical-devices/guidance-documents</a>                                                                                                                                                                                                                                                               |
| Consideration of Uncertainty in Making Benefit-Risk Determinations in Medical Device Premarket Approvals, De Novo Classifications, and Humanitarian Device Exemptions | FDA_BRA_Uncertainty | Guidance | <a href="https://www.fda.gov/regulatory-information/search-fda-guidance-documents/consideration-uncertainty-making-benefit-risk-determinations-medical-device-premarket-approvals-de">https://www.fda.gov/regulatory-information/search-fda-guidance-documents/consideration-uncertainty-making-benefit-risk-determinations-medical-device-premarket-approvals-de</a>                           |
| Factors to Consider When Making Benefit-Risk Determinations in Medical Device Premarket Approval and De Novo Classifications                                          | FDA_BRA             | Guidance | <a href="https://www.fda.gov/regulatory-information/search-fda-guidance-documents/factors-consider-when-making-benefit-risk-determinations-medical-device-premarket-approval-and-de">https://www.fda.gov/regulatory-information/search-fda-guidance-documents/factors-consider-when-making-benefit-risk-determinations-medical-device-premarket-approval-and-de</a>                             |
| MDCG 2019-16 Rev.1                                                                                                                                                    | MDCG_2019-16        | Guidance | <a href="https://health.ec.europa.eu/document/download/b23b362f-8a56-434c-922a-5b3ca4d0a7a1_en">https://health.ec.europa.eu/document/download/b23b362f-8a56-434c-922a-5b3ca4d0a7a1_en</a>                                                                                                                                                                                                       |
| Pre-market Requirements for Medical Device Cybersecurity                                                                                                              | HC_Cyber            | Guidance | <a href="https://www.canada.ca/en/health-canada/services/drugs-health-products/medical-devices/application-information/guidance-documents/cybersecurity/document.html">https://www.canada.ca/en/health-canada/services/drugs-health-products/medical-devices/application-information/guidance-documents/cybersecurity/document.html</a>                                                         |
| Medical device cyber security guidance for industry                                                                                                                   | TGA_Cyber_Dev       | Guidance | <a href="https://www.tga.gov.au/resources/guidance/complying-medical-device-cyber-security-requirements">https://www.tga.gov.au/resources/guidance/complying-medical-device-cyber-security-requirements</a>                                                                                                                                                                                     |
| Medical device cyber security information for users                                                                                                                   | TGA_Cyber_User      | Guidance | <a href="https://www.tga.gov.au/resources/resource/reference-material/medical-device-cyber-security-information-users">https://www.tga.gov.au/resources/resource/reference-material/medical-device-cyber-security-information-users</a>                                                                                                                                                         |
| Principles and practices for medical device cybersecurity                                                                                                             | IMDRF_Cyber         | Guidance | <a href="https://www.imdrf.org/documents/principles-and-practices-medical-device-cybersecurity">https://www.imdrf.org/documents/principles-and-practices-medical-device-cybersecurity</a>                                                                                                                                                                                                       |
| Regulatory Guidelines for Software Medical Devices – A Life Cycle Approach                                                                                            | HSA_Cyber           | Guidance | <a href="https://www.hsa.gov.sg/medical-devices/guidance-documents">https://www.hsa.gov.sg/medical-devices/guidance-documents</a>                                                                                                                                                                                                                                                               |
| Guideline on Review and Approval for Cybersecurity of Medical Devices (For industry)                                                                                  | MFDS_Cyber          | Guidance | <a href="https://www.mfds.go.kr/eng/brd/m_40/list.do?page=2&amp;srchFr=&amp;srchTo=&amp;srchWord=&amp;srchTp=&amp;itm_seq_1=0&amp;itm_seq_2=0&amp;multi_itm_seq=0&amp;company_cd=&amp;company_nm=">https://www.mfds.go.kr/eng/brd/m_40/list.do?page=2&amp;srchFr=&amp;srchTo=&amp;srchWord=&amp;srchTp=&amp;itm_seq_1=0&amp;itm_seq_2=0&amp;multi_itm_seq=0&amp;company_cd=&amp;company_nm=</a> |
| Software and AI as a Medical Device Change Programme                                                                                                                  | MHRA_SaMD           | Guidance | <a href="https://www.gov.uk/government/publications/software-and-ai-as-a-medical-device-change-programme/software-and-ai-as-a-medical-device-change-programme-roadmap">https://www.gov.uk/government/publications/software-and-ai-as-a-medical-device-change-programme/software-and-ai-as-a-medical-device-change-programme-roadmap</a>                                                         |
| Complying with the Essential Principles on the safety and performance of medical devices                                                                              | TGA_Safety          | Guidance | <a href="https://www.tga.gov.au/resources/guidance/complying-essential-principles-safety-and-performance-medical-devices">https://www.tga.gov.au/resources/guidance/complying-essential-principles-safety-and-performance-medical-devices</a>                                                                                                                                                   |
| Cybersecurity in medical devices: quality system considerations and content of premarket submissions                                                                  | FDA_Cyber_Pre       | Guidance | <a href="https://www.fda.gov/regulatory-information/search-fda-guidance-documents/cybersecurity-medical-devices-quality-system-considerations-and-content-premarket-submissions">https://www.fda.gov/regulatory-information/search-fda-guidance-documents/cybersecurity-medical-devices-quality-system-considerations-and-content-premarket-submissions</a>                                     |
| Principles and practices for software bill of material for medical device cybersecurity                                                                               | IMDRF_SBOM          | Guidance | <a href="https://www.imdrf.org/documents/principles-and-practices-software-bill-materials-medical-device-cybersecurity">https://www.imdrf.org/documents/principles-and-practices-software-bill-materials-medical-device-cybersecurity</a>                                                                                                                                                       |
| Principles and practices for cybersecurity of legacy medical device                                                                                                   | IMDRF_LegMD         | Guidance | <a href="https://www.imdrf.org/documents/principles-and-practices-cybersecurity-legacy-medical-devices">https://www.imdrf.org/documents/principles-and-practices-cybersecurity-legacy-medical-devices</a>                                                                                                                                                                                       |
| IEC 82304-1:2016                                                                                                                                                      | IEC_82304-1         | Standard | <a href="https://www.iso.org/standard/59543.html">https://www.iso.org/standard/59543.html</a>                                                                                                                                                                                                                                                                                                   |
| ISO 14971:2019                                                                                                                                                        | ISO_14971           | Standard | <a href="https://www.iso.org/standard/72704.html">https://www.iso.org/standard/72704.html</a>                                                                                                                                                                                                                                                                                                   |
| IEC 80001-1:2021                                                                                                                                                      | IEC_80001-1         | Standard | <a href="https://webstore.iec.ch/en/publication/34263">https://webstore.iec.ch/en/publication/34263</a>                                                                                                                                                                                                                                                                                         |

|                                                                                   |               |                  |                                                                                                                                 |
|-----------------------------------------------------------------------------------|---------------|------------------|---------------------------------------------------------------------------------------------------------------------------------|
| IEC 81001-5-1:2021                                                                | IEC_81001-5-1 | Standard         | <a href="https://www.iso.org/standard/76097.html">https://www.iso.org/standard/76097.html</a>                                   |
| ANSI/AAMI SW96:2023                                                               | AAMI_SW96     | Standard         | <a href="https://array.aami.org/doi/10.2345/9781570208621">https://array.aami.org/doi/10.2345/9781570208621</a>                 |
| IEC 80002-1:2009                                                                  | IEC_80002-1   | Technical Report | <a href="https://www.iso.org/standard/54146.html">https://www.iso.org/standard/54146.html</a>                                   |
| IEC/TR 80001-2-2:2012                                                             | IEC_80001-2-2 | Technical Report | <a href="https://www.iso.org/standard/57939.html">https://www.iso.org/standard/57939.html</a>                                   |
| IEC/TR 80001-2-1:2012                                                             | IEC_80001-2-1 | Technical Report | <a href="https://www.iso.org/standard/57934.html">https://www.iso.org/standard/57934.html</a>                                   |
| ISO/TR 80001-2-7:2015                                                             | ISO_80001-2-7 | Technical Report | <a href="https://www.iso.org/standard/63509.html">https://www.iso.org/standard/63509.html</a>                                   |
| Principles for medical device security - Risk Management; AAMI TIR57:2016/(R)2023 | AAMI_TIR57    | Technical Report | <a href="https://array.aami.org/doi/abs/10.2345/9781570206122.ch1">https://array.aami.org/doi/abs/10.2345/9781570206122.ch1</a> |
| ISO TR 24971:2020                                                                 | ISO_24971     | Technical Report | <a href="https://www.iso.org/standard/74437.html">https://www.iso.org/standard/74437.html</a>                                   |
